# Supplementary material for: Ultrastructural insights into the microsporidian infection apparatus reveal the kinetics and morphological transitions of polar tube and cargo during host cell invasion
Source: PubMed Central journal article supplement (PMC10931468; doi:10.1371/journal.pbio.3002533), 2024-02-29

S2 Data File  
Uncropped SDS-PAGE gel used in Fig 4c.

Fig 4c

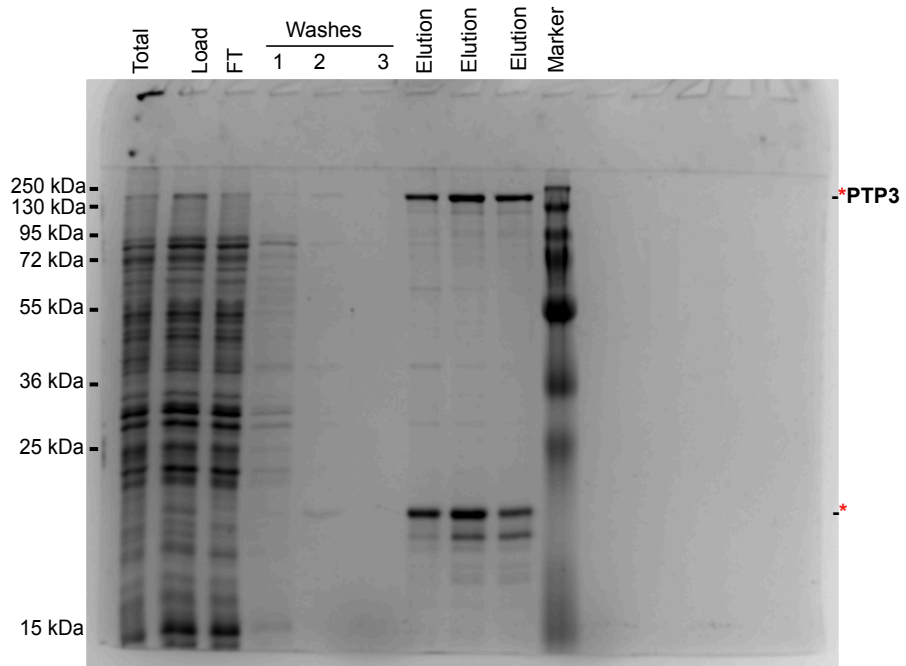

Supplement: pbio.3002533.s002.pdf [file pbio.3002533.s002.pdf]
