# Supplementary material for: Ultrastructural insights into the microsporidian infection apparatus reveal the kinetics and morphological transitions of polar tube and cargo during host cell invasion
Source: PubMed Central journal article supplement (PMC10931468; doi:10.1371/journal.pbio.3002533), 2024-02-29
Supplement: pbio.3002533.s004.pdf [file pbio.3002533.s004.pdf]

**S1 Table. Cryo-ET data collection parameters.**

| <b>Data collection parameters</b>                           |                 |
|-------------------------------------------------------------|-----------------|
| Microscope                                                  | Titan Krios G2  |
| Voltage (kV)                                                | 300             |
| Camera                                                      | Gatan K2        |
| Energy filter                                               | Yes, BioQuantum |
| Magnification                                               | 64000x          |
| Total Electron dosage ( $e^-/\text{\AA}^2$ )                | 110 to 120      |
| Defocus range ( $\mu\text{m}$ )                             | -1.5 to 5       |
| Tilt range ( $^\circ$ )                                     | -60 to +60      |
| Tilt angle increment ( $^\circ$ )                           | 2/3             |
| Frames per movie                                            | 10              |
| Object pixel size ( $\text{\AA}$ ) at super-resolution mode | 2.173           |
| Number of tomograms                                         | 50              |
