# Supplementary material for: Ultrastructural insights into the microsporidian infection apparatus reveal the kinetics and morphological transitions of polar tube and cargo during host cell invasion
Source: PubMed Central journal article supplement (PMC10931468; doi:10.1371/journal.pbio.3002533), 2024-02-29
Supplement: pbio.3002533.s005.pdf [file pbio.3002533.s005.pdf]

**S2 Table. Mass spectrometry results of a PTP3 affinity-purified sample.** The list of mass spectrometry hits is arranged according to peptide-spectrum match (PSM). The number of consecutive histidines (3xHis, 4xHis, 7xHis) in the protein is listed. PTP3 is the only protein with seven consecutive histidines.

| Accession Code | Description                                                  | Coverage [%] | # Peptides | # PSMs | # Unique Peptides | MW [kDa] | 3xHis | 4xHis | 7xHis | %Disorder |
|----------------|--------------------------------------------------------------|--------------|------------|--------|-------------------|----------|-------|-------|-------|-----------|
| VNE6901_135    | Polar tube protein 3 (PTP3)                                  | 71           | 99         | 591    | 99                | 151      | 2     | 1     | 1     | 56.40     |
| VNE6904_200    | Polar tube protein 2 (PTP2)                                  | 55           | 14         | 30     | 14                | 30.1     | 0     | 0     | 0     | 15.66     |
| VNE6909_014    | Ricin B lectin (RBL7)                                        | 47           | 13         | 28     | 13                | 24.3     | 0     | 0     | 0     | 7.18      |
| VNE6901_309    | Ricin B lectin (RBL3c)                                       | 52           | 13         | 16     | 13                | 25.2     | 0     | 0     | 0     | 9.29      |
| VNE6901_034    | Ricin B lectin (PTP6a)                                       | 60           | 12         | 200    | 12                | 24.3     | 0     | 0     | 0     | 13.27     |
| VNE6910_036    | Ricin B lectin (RBL4b)                                       | 62           | 12         | 131    | 12                | 21.2     | 0     | 0     | 0     | 17.74     |
| VNE6901_039    | Ricin B lectin (PTP6d)                                       | 64           | 11         | 75     | 11                | 23.3     | 1     | 1     | 0     | 16.42     |
| VNE6909_187    | hypothetical SP-containing protein                           | 36           | 10         | 17     | 10                | 33.3     | 0     | 0     | 0     | 34.62     |
| VNE6901_358    | Lysine-tRNA ligase (KARS1)                                   | 19           | 10         | 13     | 10                | 59.4     | 0     | 0     | 0     | 5.18      |
| VNE6909_165    | Ribosomal protein eS1                                        | 38           | 9          | 13     | 9                 | 26.9     | 0     | 0     | 0     | 13.33     |
| VNE6911_083    | Heat shock protein 70-like protein                           | 16           | 9          | 9      | 9                 | 74.5     | 0     | 0     | 0     | 14.78     |
| VNE6904_210    | hypothetical SP-containing protein                           | 62           | 8          | 26     | 8                 | 15.6     | 0     | 0     | 0     | 3.70      |
| VNE6903_132    | Ribosomal protein MDF2                                       | 51           | 8          | 12     | 8                 | 24       | 0     | 0     | 0     | 63.37     |
| VNE6901_289    | Triosephosphate isomerase                                    | 26           | 7          | 9      | 7                 | 26.9     | 0     | 0     | 0     | 2.50      |
| VNE6912_035    | hypothetical membrane protein                                | 14           | 7          | 9      | 7                 | 48.2     | 0     | 0     | 0     | 54.42     |
| VNE6903_264    | Putative endonuclease/exonuclease/phosphatase family protein | 27           | 7          | 8      | 7                 | 33.3     | 0     | 0     | 0     | 2.34      |
| VNE6905_175    | Ribosomal protein uS4                                        | 36           | 7          | 8      | 7                 | 21.7     | 0     | 0     | 0     | 21.35     |
| VNE6907_076    | Ribosomal protein eS4                                        | 27           | 7          | 7      | 7                 | 30       | 0     | 0     | 0     | 7.87      |
| VNE6902_049    | Ribosomal protein uL24                                       | 43           | 6          | 9      | 6                 | 16.1     | 0     | 0     | 0     | 22.70     |
| VNE6903_258    | Ricin B lectin (RBL4c)                                       | 31           | 6          | 9      | 6                 | 21.1     | 0     | 0     | 0     | 6.45      |
| VNE6901_023    | Protein argonaute-2 (AGO2)                                   | 8            | 6          | 6      | 6                 | 92.2     | 0     | 0     | 0     | 10.92     |
| VNE6903_024    | Putative splicing factor                                     | 18           | 5          | 12     | 5                 | 37.3     | 0     | 0     | 0     | 36.14     |
| VNE6901_040    | Ricin B lectin (RBL4d)                                       | 25           | 5          | 9      | 5                 | 21.7     | 0     | 0     | 0     | 25.93     |
| VNE6906_226    | Ribosomal protein uL2                                        | 21           | 5          | 7      | 5                 | 26       | 0     | 0     | 0     | 22.92     |
| VNE6905_120    | Retrovirus-related Pol polyprotein from transposon Pr125Pol  | 4            | 5          | 5      | 5                 | 136.7    | 0     | 0     | 0     | 11.01     |
| VNE6911_031    | hypothetical protein                                         | 27           | 4          | 7      | 4                 | 13.3     | 0     | 0     | 0     | 96.03     |
| VNE6901_014    | hypothetical protein                                         | 34           | 4          | 5      | 4                 | 19.4     | 0     | 0     | 0     | 23.81     |
| VNE6907_050    | Ribosomal protein uL14                                       | 37           | 4          | 5      | 4                 | 16       | 0     | 0     | 0     | 15.54     |
| VNE6912_194    | Ribosomal protein uL6                                        | 22           | 4          | 5      | 4                 | 21       | 0     | 0     | 0     | 2.65      |
| VNE6902_098    | Ribosomal protein eL19                                       | 23           | 4          | 4      | 4                 | 18.6     | 0     | 0     | 0     | 18.52     |
| VNE6907_057    | Ribosomal protein uS15                                       | 29           | 4          | 4      | 4                 | 17       | 0     | 0     | 0     | 12.58     |
| VNE6911_140    | Ribosomal protein eL32                                       | 20           | 3          | 5      | 3                 | 16.1     | 0     | 0     | 0     | 13.48     |
| VNE6903_263    | Ribosomal protein eL24                                       | 29           | 3          | 4      | 3                 | 10.3     | 0     | 0     | 0     | 22.83     |
| VNE6903_368    | Ricin B lectin (RBL6)                                        | 19           | 3          | 4      | 3                 | 21       | 0     | 0     | 0     | 11.96     |
| VNE6911_060    | Ribosomal protein uS9                                        | 18           | 3          | 4      | 3                 | 17.5     | 0     | 0     | 0     | 14.01     |
| VNE6901_104    | Nuclear segregation protein BFR1-like                        | 9            | 3          | 3      | 3                 | 45.6     | 0     | 0     | 0     | 19.80     |
| VNE6902_200    | Putative subtilisin-like proteinase                          | 5            | 3          | 3      | 3                 | 51       | 0     | 0     | 0     | 13.67     |
| VNE6912_127    | Elongation factor 1-alpha 1 (EF1A1)                          | 10           | 3          | 3      | 3                 | 51.1     | 0     | 0     | 0     | 7.43      |
| VNE6901_035    | Ricin B lectin (PTP6b)                                       | 14           | 2          | 2      | 2                 | 21.4     | 0     | 0     | 0     | 8.56      |
| VNE6901_308    | Ricin B lectin (RBL3b)                                       | 10           | 2          | 2      | 2                 | 20.3     | 0     | 0     | 0     | 3.35      |
| VNE6901_368    | Ribosomal protein eL27                                       | 13           | 2          | 2      | 2                 | 14.5     | 0     | 0     | 0     | 2.34      |
| VNE6902_064    | High mobility group protein                                  | 8            | 2          | 2      | 2                 | 24       | 0     | 0     | 0     | 43.81     |
| VNE6902_107    | Ribosomal protein uL18                                       | 7            | 2          | 2      | 2                 | 34.4     | 0     | 0     | 0     | 15.05     |
| VNE6904_059    | Integrase catalytic domain-containing protein                | 4            | 2          | 2      | 2                 | 70.3     | 0     | 0     | 0     | 70.34     |
| VNE6908_017    | Histone H2A (H2A)                                            | 15           | 2          | 2      | 2                 | 13       | 0     | 0     | 0     | 24.39     |
| VNE6910_078    | Ribosomal protein uS11                                       | 16           | 2          | 2      | 2                 | 14.4     | 0     | 0     | 0     | 19.71     |
| VNE6904_195    | Polar tube protein 1 (PTP1)                                  | 5            | 1          | 2      | 1                 | 41.6     | 0     | 0     | 0     | 46.93     |
| VNE6905_241    | Nuclear transcription factor Y subunit (nfy-1)               | 9            | 1          | 2      | 1                 | 14.6     | 0     | 0     | 0     | 49.19     |
| VNE6910_006    | hypothetical protein                                         | 1            | 1          | 2      | 1                 | 66.5     | 0     | 0     | 0     | 16.32     |
| VNE6910_107    | Ribosomal protein eL34                                       | 10           | 1          | 2      | 1                 | 12.3     | 0     | 0     | 0     | 12.15     |
| VNE6901_044    | Ribosomal protein eS24                                       | 16           | 1          | 1      | 1                 | 15.5     | 0     | 0     | 0     | 34.07     |
| VNE6901_069    | Aldose reductase                                             | 2            | 1          | 1      | 1                 | 34.8     | 0     | 0     | 0     | 1.30      |
| VNE6901_293    | Ribosomal protein eS21                                       | 22           | 1          | 1      | 1                 | 7.6      | 0     | 0     | 0     | 8.82      |
| VNE6901_343    | Ribosomal protein uS2                                        | 4            | 1          | 1      | 1                 | 29.6     | 0     | 0     | 0     | 18.28     |
| VNE6901_372    | Histone domain-containing protein                            | 5            | 1          | 1      | 1                 | 16.4     | 0     | 0     | 0     | 31.29     |
| VNE6901_379    | Ribosomal protein uS17                                       | 9            | 1          | 1      | 1                 | 18.2     | 0     | 0     | 0     | 11.88     |
| VNE6902_019    | hypothetical SP-containing protein                           | 6            | 1          | 1      | 1                 | 21       | 0     | 0     | 0     | 22.45     |
| VNE6902_041    | Ribosomal protein uS19                                       | 6            | 1          | 1      | 1                 | 16       | 0     | 0     | 0     | 18.62     |
| VNE6902_092    | Ribosomal protein uS13                                       | 9            | 1          | 1      | 1                 | 18       | 0     | 0     | 0     | 16.05     |
| VNE6902_093    | Ribosomal protein msL1                                       | 11           | 1          | 1      | 1                 | 8.8      | 0     | 0     | 0     | 32.43     |
| VNE6903_164    | hypothetical protein                                         | 2            | 1          | 1      | 1                 | 45.8     | 0     | 0     | 0     | 12.85     |
| VNE6904_037    | Ribosomal protein uS5                                        | 4            | 1          | 1      | 1                 | 25.9     | 0     | 0     | 0     | 8.33      |
| VNE6904_069    | Serpin-type proteinase inhibitor 2                           | 2            | 1          | 1      | 1                 | 40.6     | 0     | 0     | 0     | 1.97      |
| VNE6904_088    | Ribosomal protein eL40                                       | 7            | 1          | 1      | 1                 | 14.2     | 0     | 0     | 0     | 17.05     |
| VNE6904_207    | uncharacterized protein                                      | 4            | 1          | 1      | 1                 | 21.8     | 0     | 0     | 0     | 6.99      |
| VNE6905_023    | Ribosomal protein eS26                                       | 13           | 1          | 1      | 1                 | 12.1     | 0     | 0     | 0     | 27.62     |
| VNE6905_101    | Ribosomal protein eS6                                        | 8            | 1          | 1      | 1                 | 24.9     | 0     | 0     | 0     | 15.00     |
| VNE6905_111    | Zinc finger C2H2 domain-containing protein                   | 3            | 1          | 1      | 1                 | 32.9     | 0     | 0     | 0     | 30.50     |
| VNE6905_169    | hypothetical SP-containing protein                           | 3            | 1          | 1      | 1                 | 30.5     | 0     | 0     | 0     | 8.65      |
| VNE6905_231    | Spore wall protein 8-like protein                            | 7            | 1          | 1      | 1                 | 12.4     | 0     | 0     | 0     | 18.52     |
| VNE6907_026    | Glutaredoxin                                                 | 8            | 1          | 1      | 1                 | 15.7     | 0     | 0     | 0     | 2.22      |
| VNE6907_113    | Ribosomal protein eL20                                       | 6            | 1          | 1      | 1                 | 20.9     | 0     | 0     | 0     | 9.89      |
| VNE6907_188    | uncharacterized protein                                      | 8            | 1          | 1      | 1                 | 11.8     | 0     | 0     | 0     | 49.07     |
| VNE6908_041    | hypothetical protein                                         | 4            | 1          | 1      | 1                 | 21.8     | 0     | 0     | 0     | 9.52      |
| VNE6908_165    | Ribosomal protein eS28                                       | 16           | 1          | 1      | 1                 | 7.6      | 0     | 0     | 0     | 23.53     |
| VNE6908_188    | Eukaryotic translation initiation factor 5A                  | 5            | 1          | 1      | 1                 | 17.8     | 0     | 0     | 0     | 17.83     |
| VNE6908_192    | Putative glutaredoxin                                        | 12           | 1          | 1      | 1                 | 10.2     | 0     | 0     | 0     | 13.79     |
| VNE6909_015    | Ribosomal protein eL43                                       | 10           | 1          | 1      | 1                 | 9.8      | 0     | 0     | 0     | 13.33     |
| VNE6910_008    | Ribosomal protein uS8                                        | 9            | 1          | 1      | 1                 | 14.5     | 0     | 0     | 0     | 0.78      |
| VNE6910_066    | hypothetical SP-containing protein                           | 2            | 1          | 1      | 1                 | 43.9     | 0     | 0     | 0     | 75.66     |
| VNE6910_158    | Ribosomal protein uL3                                        | 2            | 1          | 1      | 1                 | 43.1     | 0     | 0     | 0     | 17.44     |
| VNE6911_029    | Ribosomal protein uL29                                       | 9            | 1          | 1      | 1                 | 14.8     | 0     | 0     | 0     | 12.90     |
| VNE6912_041    | Ribosomal protein eL30                                       | 11           | 1          | 1      | 1                 | 11.8     | 0     | 0     | 0     | 14.68     |
| VNE6912_114    | hypothetical SP-containing protein                           | 4            | 1          | 1      | 1                 | 26.3     | 0     | 0     | 0     | 38.46     |
