# Supplementary material for: Ultrastructural insights into the microsporidian infection apparatus reveal the kinetics and morphological transitions of polar tube and cargo during host cell invasion
Source: PubMed Central journal article supplement (PMC10931468; doi:10.1371/journal.pbio.3002533), 2024-02-29
Supplement: pbio.3002533.s006.pdf [file pbio.3002533.s006.pdf]

**S3 Table. In-gel mass spectrometry analysis of PTP3 affinity-purified sample.** The two prominent protein bands indicated by an asterisk (\*) in Figure 4c, one around kDa and 20 kDa were sliced and analyzed. The list of mass spectrometry hits is arranged according to peptide-spectrum match (PSM).

| Description                                                 | Coverage [%] | # Peptides | # PSMs | # Unique Peptides | MW [kDa] | # Peptides: (~150 kDa) | # Peptides (~20 kDa) |
|-------------------------------------------------------------|--------------|------------|--------|-------------------|----------|------------------------|----------------------|
| PTP3                                                        | 89           | 153        | 2271   | 153               | 151.00   | 150                    | 33                   |
| uncharacterized protein                                     | 12           | 10         | 20     | 10                | 91.60    | 10                     |                      |
| DNA-directed RNA polymerase I subunit RPA190 (RPA1)         | 9            | 10         | 15     | 10                | 157.40   | 10                     |                      |
| elongation factor 1-alpha 1 (EF1A1)                         | 26           | 7          | 9      | 7                 | 51.10    | 4                      | 1                    |
| DNA-directed RNA polymerase II subunit RPB2                 | 55           | 58         | 94     | 58                | 131.70   | 3                      |                      |
| hypothetical protein                                        | 2            | 1          | 6      | 1                 | 84.80    | 1                      |                      |
| ricin B lectin (PTP6a)                                      | 80           | 17         | 246    | 17                | 24.30    | 2                      | 17                   |
| polar tube protein 1 (PTP1)                                 | 9            | 2          | 4      | 2                 | 41.60    | 1                      |                      |
| ribosomal protein eL13                                      | 23           | 3          | 5      | 3                 | 18.90    |                        | 3                    |
| hypothetical membrane protein                               | 17           | 8          | 10     | 8                 | 48.20    |                        | 8                    |
| ricin B lectin (PTP6c)                                      | 11           | 3          | 6      | 1                 | 20.20    |                        | 3                    |
| ribosomal protein uL13                                      | 17           | 3          | 3      | 3                 | 22.30    |                        | 3                    |
| uncharacterized membrane protein                            | 29           | 4          | 7      | 4                 | 21.50    | 4                      | 4                    |
| ricin B lectin (RBL4c)                                      | 35           | 3          | 4      | 3                 | 21.70    |                        | 3                    |
| ricin B lectin (RBL4a)                                      | 31           | 4          | 6      | 4                 | 21.20    | 4                      | 4                    |
| ribosomal protein eL19                                      | 18           | 3          | 4      | 3                 | 18.60    |                        | 3                    |
| proteasome subunit PSB4 (PSB4)                              | 7            | 1          | 1      | 1                 | 22.00    |                        | 1                    |
| polar tube protein 2 (PTP2)                                 | 30           | 8          | 16     | 8                 | 30.10    |                        | 8                    |
| ricin B lectin (RBL3c)                                      | 9            | 2          | 2      | 2                 | 25.20    |                        | 2                    |
| ricin B lectin (PTP6d)                                      | 72           | 16         | 80     | 14                | 23.30    |                        | 16                   |
| putative splicing factor                                    | 22           | 6          | 7      | 6                 | 37.30    |                        | 6                    |
| spore wall protein 25-like                                  | 12           | 2          | 2      | 2                 | 25.80    |                        | 2                    |
| RNA-binding protein                                         | 8            | 1          | 1      | 1                 | 20.60    |                        | 1                    |
| ribosomal protein uL2                                       | 8            | 1          | 1      | 1                 | 26.00    |                        | 1                    |
| ribosomal protein uS7                                       | 5            | 1          | 1      | 1                 | 20.90    |                        | 1                    |
| retrovirus-related pol polyprotein from transposon Pr125pol | 6            | 7          | 10     | 7                 | 136.70   |                        | 7                    |
| eukaryotic translation initiation factor 5A                 | 43           | 8          | 14     | 8                 | 17.80    |                        | 8                    |
| proteasome subunit PSB3 (PSB3)                              | 16           | 4          | 4      | 4                 | 23.00    |                        | 4                    |
| 60S ribosomal protein L20                                   | 59           | 11         | 15     | 11                | 20.90    |                        | 11                   |
| ricin B lectin (PTP6b)                                      | 47           | 8          | 14     | 8                 | 21.40    |                        | 8                    |
| ubiquitin-like protein                                      | 4            | 1          | 2      | 1                 | 36.10    |                        | 1                    |
| hypothetical SP-containing protein                          | 34           | 4          | 4      | 4                 | 19.40    |                        | 4                    |
| DNA-directed RNA polymerase III subunit (RPC2)              | 8            | 7          | 7      | 7                 | 123.90   |                        |                      |
| hypothetical SP-containing protein                          | 13           | 2          | 2      | 2                 | 21.00    |                        | 2                    |
| hypothetical SP-containing membrane protein                 | 7            | 1          | 1      | 1                 | 21.10    |                        | 1                    |
| glutaredoxin-3 (GRX3)                                       | 32           | 5          | 8      | 5                 | 22.10    |                        | 5                    |
| hypothetical SP-containing protein                          | 8            | 1          | 1      | 1                 | 33.30    |                        | 1                    |
| spore wall protein 26                                       | 9            | 2          | 2      | 2                 | 24.70    |                        | 2                    |
| proteasome subunit PSB5 (PSB5)                              | 31           | 4          | 4      | 4                 | 25.20    |                        | 4                    |
| hypothetical SP-containing protein                          | 9            | 1          | 1      | 1                 | 12.40    |                        | 1                    |
| separin (ESP1)                                              | 2            | 1          | 1      | 1                 | 92.10    |                        | 1                    |
| zinc finger C2H2 domain-containing protein                  | 19           | 4          | 4      | 4                 | 32.90    |                        | 4                    |
| triosephosphate isomerase                                   | 11           | 2          | 2      | 2                 | 26.90    |                        | 2                    |
| integrase catalytic domain-containing protein               | 4            | 2          | 2      | 2                 | 70.30    |                        | 2                    |
| proteasome subunit PSB1 (PSB1)                              | 14           | 3          | 3      | 3                 | 23.50    |                        | 3                    |
| uncharacterized protein                                     | 7.00         | 1.00       | 5.00   | 1.00              | 24.50    |                        | 1                    |
